# Supplementary material
Source: publisher site journal article supplement (https://www.spandidos-publications.com/2229/downloadSupplementary)

Figure S1. Overall survival rate of patients with OS with a high or low expression of KCNQ1OT1 analyzed by the Kaplan-Meier method. OS, osteosarcoma.

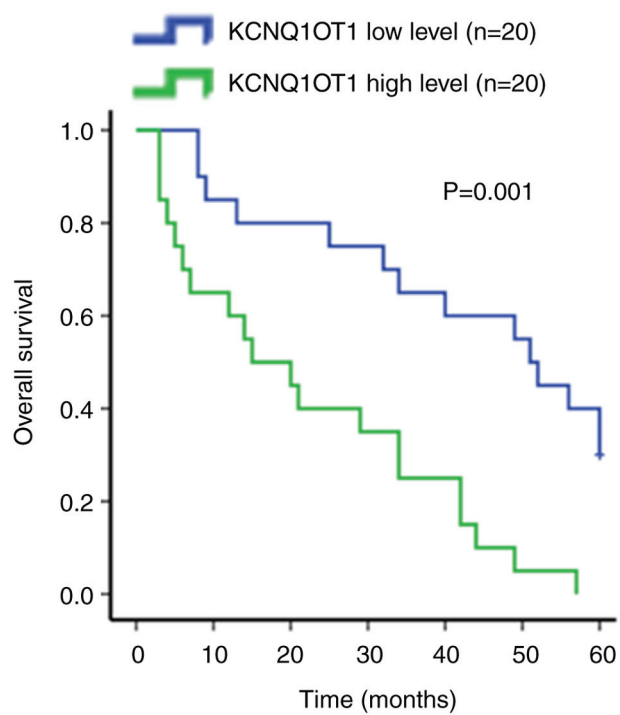

Figure S2. (A and B) Cell proliferation following transfection with the indicated plasmids was examined by CCK-8 and colony formation assays. (C and D) The indicated plasmids were transfected into U2OS cells and cell migration and invasion were monitored by Transwell assay. \*\*P<0.01 vs. respective control. OS, osteosarcoma.

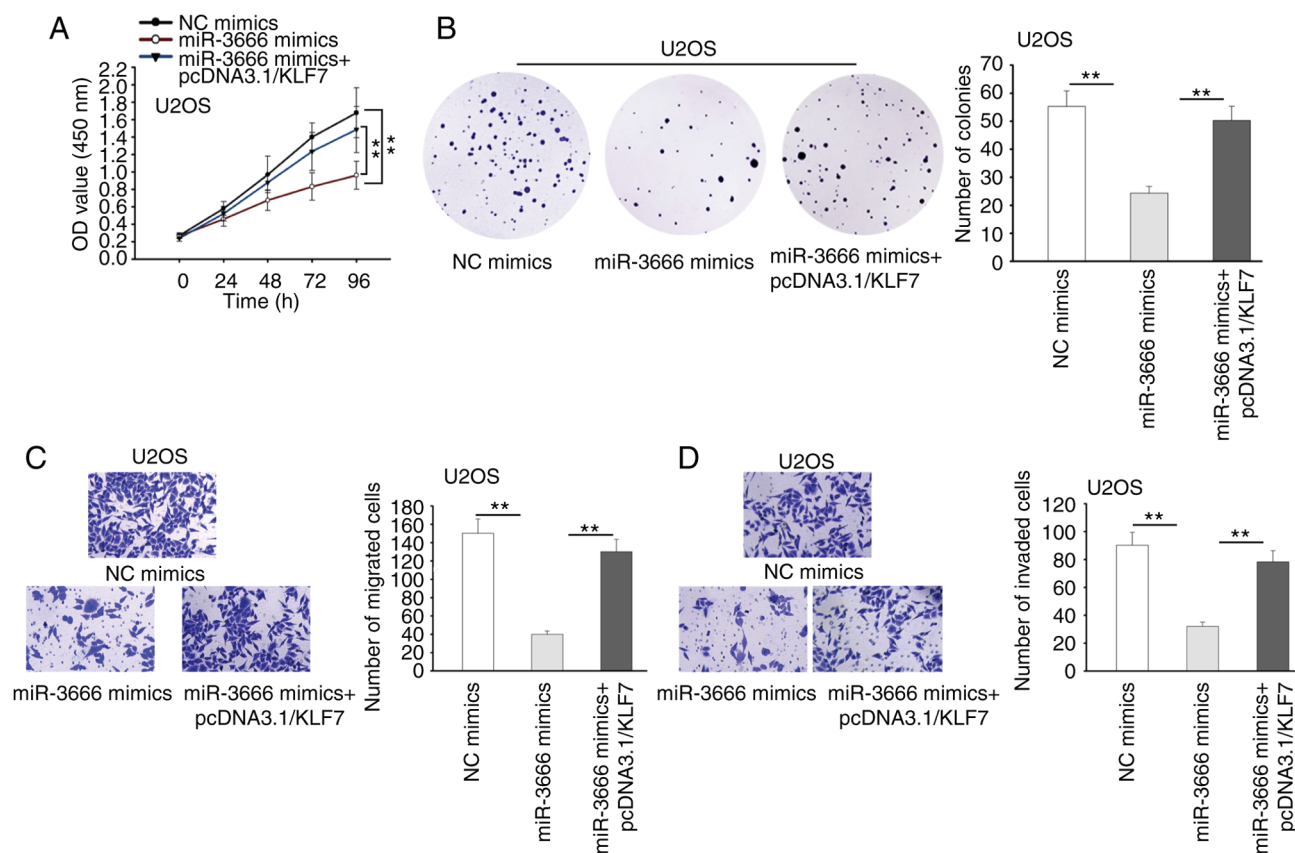

Figure S3. Western blot analysis was carried out to evaluate the protein levels of KLF7,  $\beta$ -catenin, MMP7 and c-Myc in each group. KLF7, Kruppel-like factor 7; MMP7, matrix metalloproteinase 7.

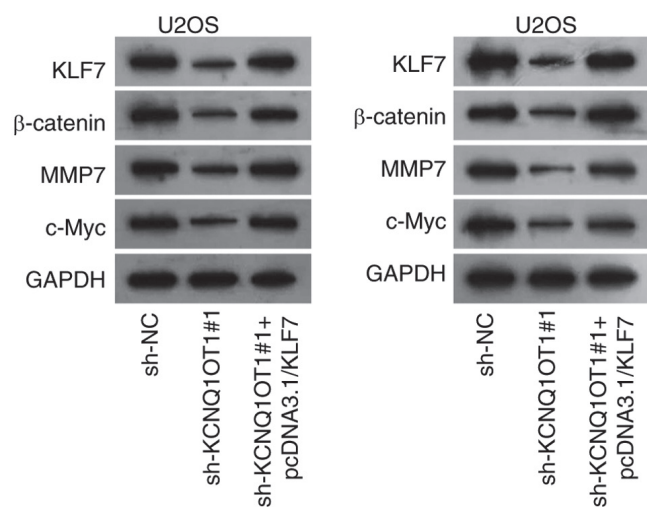

Supplement: Supplementary file 1 [file downloadSupplementary]
